# Supplementary material for: Fabrication of 3D objects incorporating peptides covalently attached via reversible disulfide linkages with potential for controlled drug release
Source: Royal Society of Chemistry journal article supplement (doi:10.1039/d3lp00250k), 2024-01-01
Supplement: d3lp00250k1.pdf [file d3lp00250k1.pdf]

## Fabrication of 3D objects incorporating peptides covalently attached via reversible disulfide linkages with potential for controlled drug release

Zhongyuan Wan, Wai Hin Lee, Yicheng Wang, Ataula Shegiwal\* and David M Haddleton\*

### Supporting Information

#### Synthesis of *N,N'*-bisacryloyl cystamine (BAC)

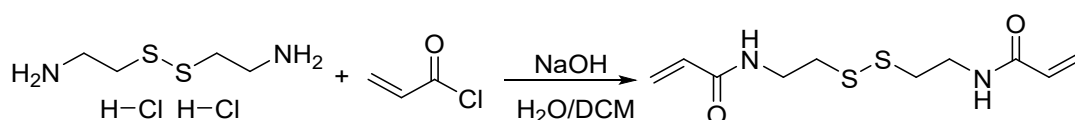

SI Scheme 1. Synthesis of the bisacrylamide disulphide containing crosslinking agent (BAC)

11.26 g (0.05 mol) cystamine dichlorohydrate was dissolved in 100 ml deionized  $\text{H}_2\text{O}$ . 20 ml of a 10 M sodium hydroxide solution was added, and the mixture cooled to  $0\text{ }^\circ\text{C}$  in an ice bath and subsequently a solution of 9.05 g (0.1 mol) acryloyl chloride in 10 ml dichloromethane was added over 15 minutes. The ice bath was removed, and the reaction allowed to continue for approximately 2 hours at ambient temperature. The crude *N,N'*-bisacryloyl cystamine (BAC) precipitated from the reaction medium and subsequently the crude BAC isolated by suction filtration and washed with 50 ml deionized  $\text{H}_2\text{O}$  3 times prior to being recrystallized from ethyl acetate. Yield = 10.12g (50.5%).

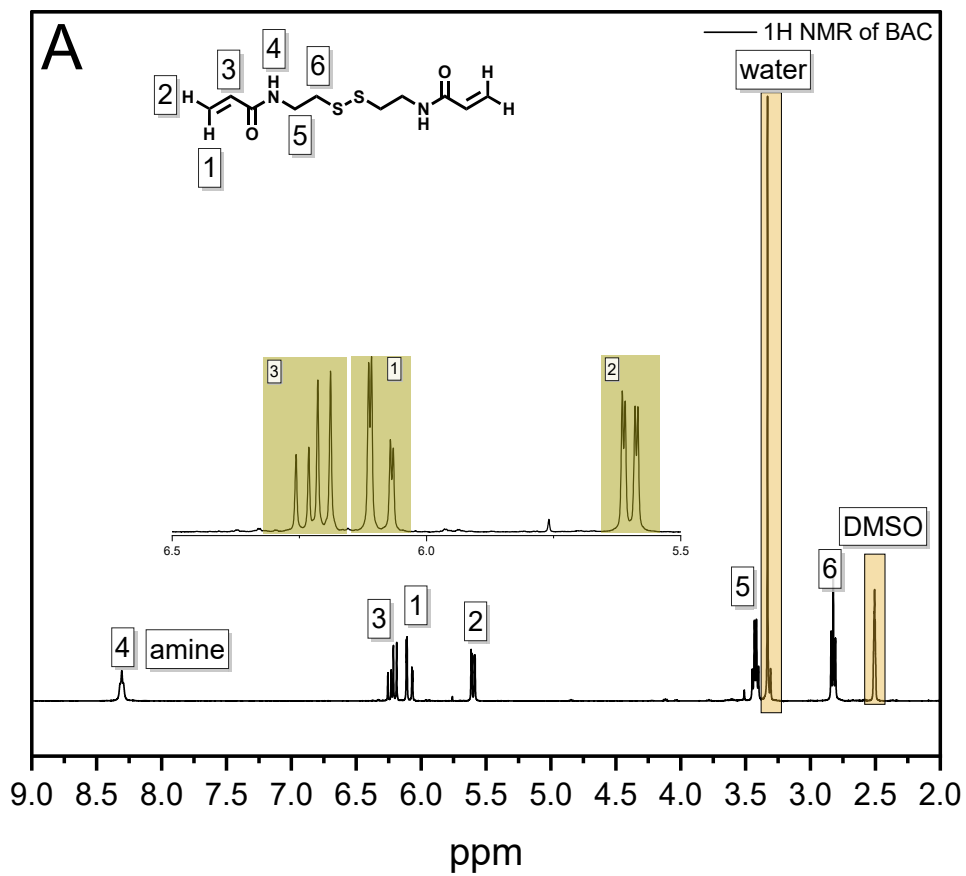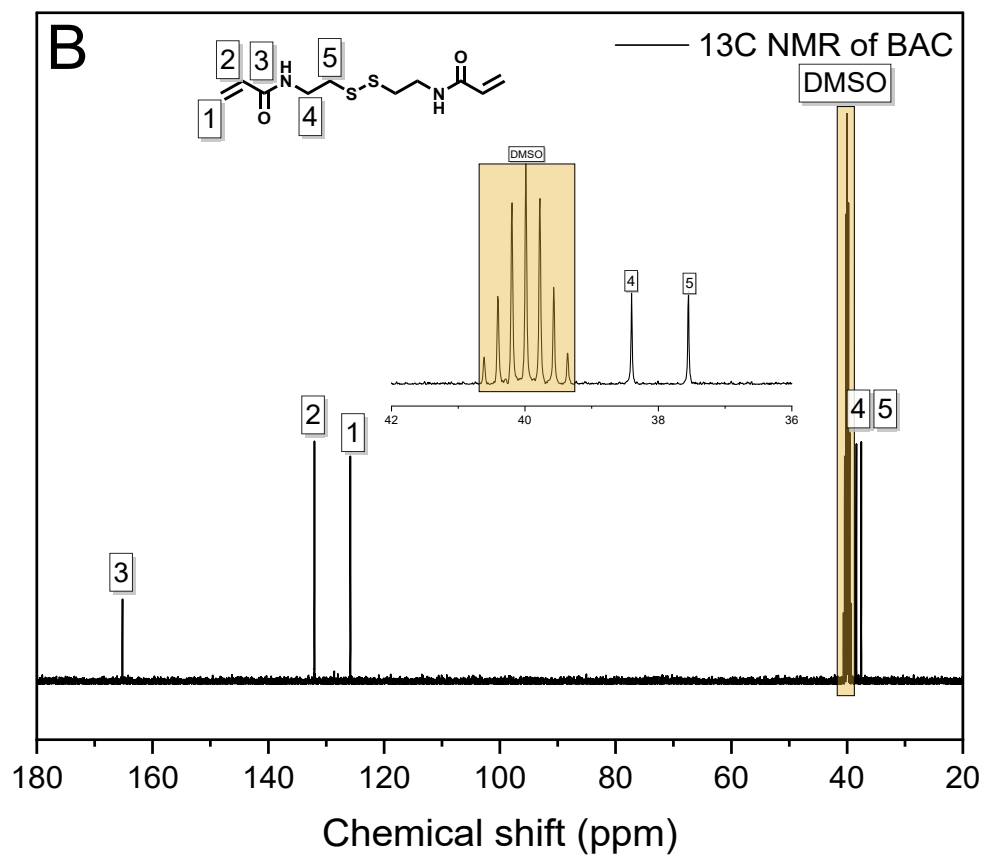

SI. 1 (A)  $^1\text{H}$  and (B)  $^{13}\text{C}$  NMR (400 MHz, DMSO) spectrum of BAC.

$^1\text{H}$  NMR (400 MHz, DMSO)  $\delta$  = 2.82 (Triplet,  $J$  = 6.72 Hz, 4H,  $\text{CCH}_2\text{S}$ ); 3.42 (Quartet,  $J$  = 6.36 Hz, 4H,  $\text{NCH}_2\text{C}$ ); 5.58, 5.61 (Doublet,  $J$  = 2.20 Hz, 2H,  $\text{C}=\text{CH}_2$ ); 6.07, 6.11 (Doublet,  $J$  = 2.20 Hz, 2H,  $\text{C}=\text{CH}_2$ ); 6.19, 6.23 (Doublet,  $J$  = 10.03 Hz, H,  $\text{HC}=\text{O}$ ); 8.31 (singlet, 2H, CNHC).

$^{13}\text{C}$  NMR (400 MHz, DMSO)  $\delta$  = 37.55 ( $-\text{C}-\text{S}-$ ), 38.40 ( $-\text{NH}-\text{C}-$ ), 125.82 ( $\underline{\text{CH}_2}=\text{CH}$ ), 132.03 ( $\text{CH}_2=\underline{\text{C}}\text{H}$ ), 165.2 ( $\text{NH}-\text{C}=\text{O}$ ).

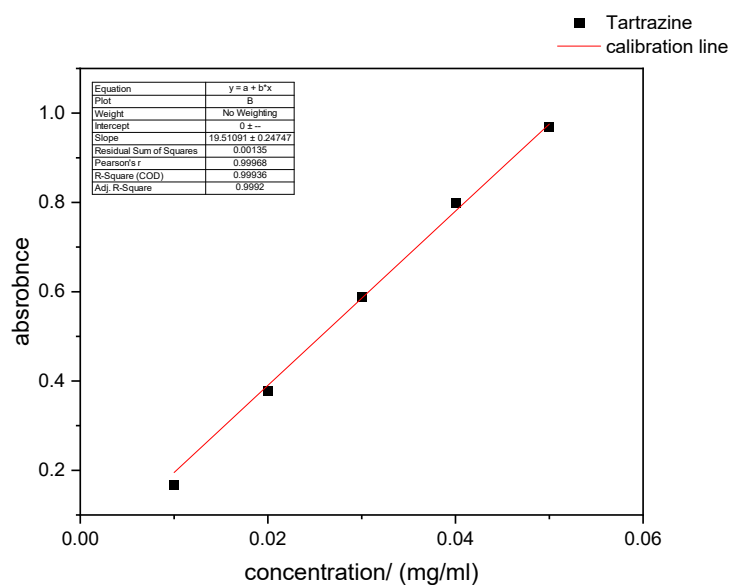

SI. 2 Calibration line for tartrazine concentration.

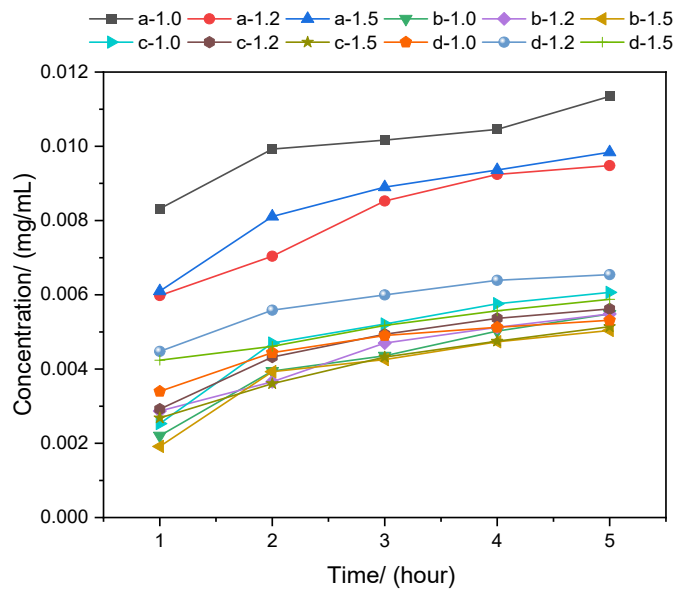

SI. 3 Concentration of tartrazine washing with DI water measured by UV-Vis over 5 hours.

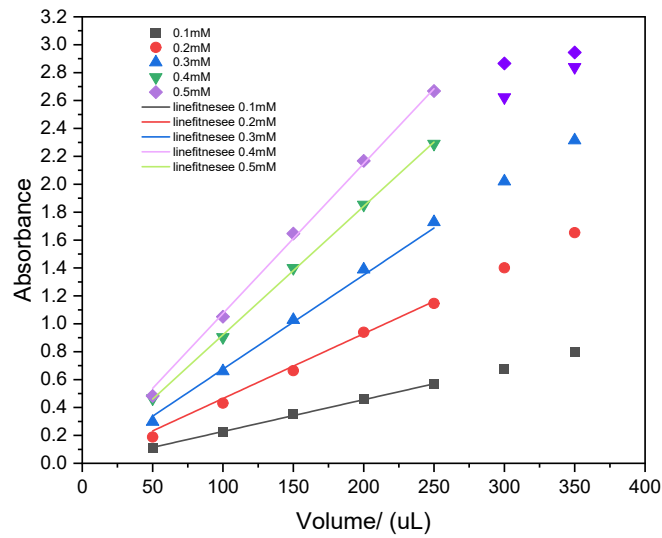

SI. 4 Calibration line of different concentration (0.1/0.2/0.3/0.4/0.5 mM) peptide in different volumes (50/100/150/200/250 uL).

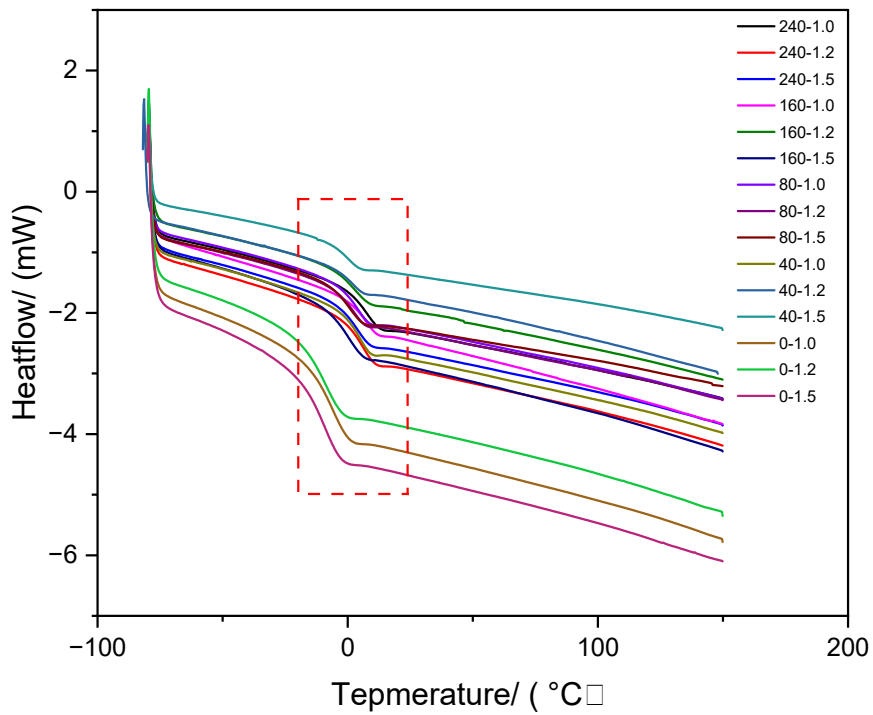

SI. 5 DSC traces of all formulations.

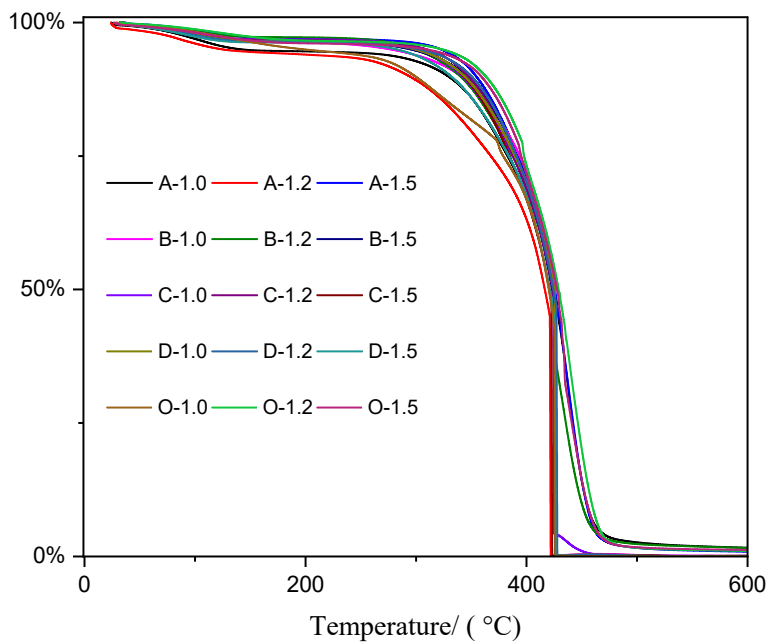

SI. 6 TGA of series 1,2,3,4, and blank series hydrogel.

|                                        | Bottom layer | Normal layer |
|----------------------------------------|--------------|--------------|
| Layer thickness/ (um)                  | 100          | 100          |
| Exposure time/ (s)                     | 10           | 7            |
| Light intensity/ (mW/cm <sup>2</sup> ) | 15.6         | 15.6         |

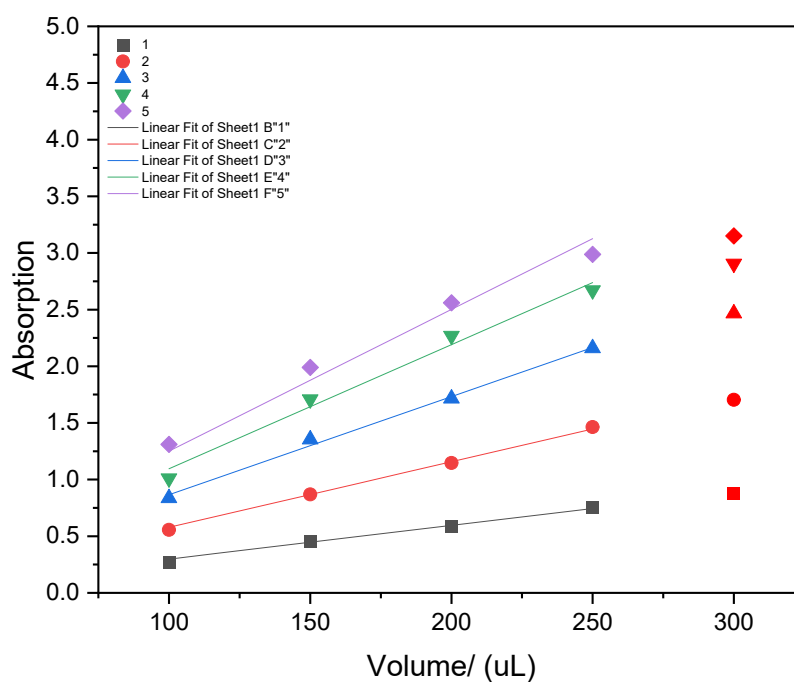

SI. 7 Calibration line of different concentration (1/2/3/4/5 mM) peptide in different volumes (50/100/150/200/250 uL) at  $\lambda = 298$  nm.

SI Table 1. The calibration of (1/2/3/4/5 mM) lanreotide at  $\lambda = 298$ nm.

| Concentration/ (mM) | Equation     | R-square |
|---------------------|--------------|----------|
| 1                   | $Y=0.00298x$ | 0.999    |
| 2                   | $Y=0.00579x$ | 0.999    |
| 3                   | $Y=0.00866x$ | 0.999    |
| 4                   | $Y=0.01095x$ | 0.999    |

|   |             |       |
|---|-------------|-------|
| 5 | $Y=0.0125x$ | 0.999 |
|---|-------------|-------|

SI Table 2. The  $T_g$  of formulation (series A/B/C/D/O)

| Formulation | A    | B    | C     | D     | O     |
|-------------|------|------|-------|-------|-------|
| 1           | 7.74 | 6.13 | 4.29  | 2.96  | -5.17 |
| 2           | 5.82 | 3.34 | 1.74  | 0.02  | -8.56 |
| 3           | 4.12 | 0.52 | -1.28 | -1.64 | -9.57 |
